# Supplementary material for: Thermally evaporated methylammonium-free perovskite solar cells
Source: Royal Society of Chemistry journal article supplement (doi:10.1039/d0tc01550d), 2020-01-01
Supplement: d0tc01550d1.pdf [file d0tc01550d1.pdf]

## Supporting Information

### Thermally Evaporated Methylammonium-Free Perovskite Solar Cells

Ran Ji,<sup>a</sup> Zongbao Zhang,<sup>a</sup> Changsoon Cho,<sup>a</sup> Qingzhi An,<sup>a</sup> Fabian Paulus,<sup>a</sup> Martin Kroll,<sup>a</sup> Markus Löffler,<sup>b</sup> Frederik Nehm,<sup>a</sup> Bernd Rellinghaus,<sup>b</sup> Karl Leo<sup>a</sup> and Yana Vaynzof<sup>a</sup>

<sup>a</sup> Integrated Centre for Applied Physics and Photonic Materials (IAPP) and the Centre for advancing electronics Dresden (cfaed), Technical University of Dresden, Nöthnizerstraße 61, 01187, Dresden, Germany.

<sup>b</sup> Dresden Center for Nanoanalysis (DCN), Center for Advancing Electronics Dresden (cfaed), Technische Universität Dresden, 01187 Dresden, Germany

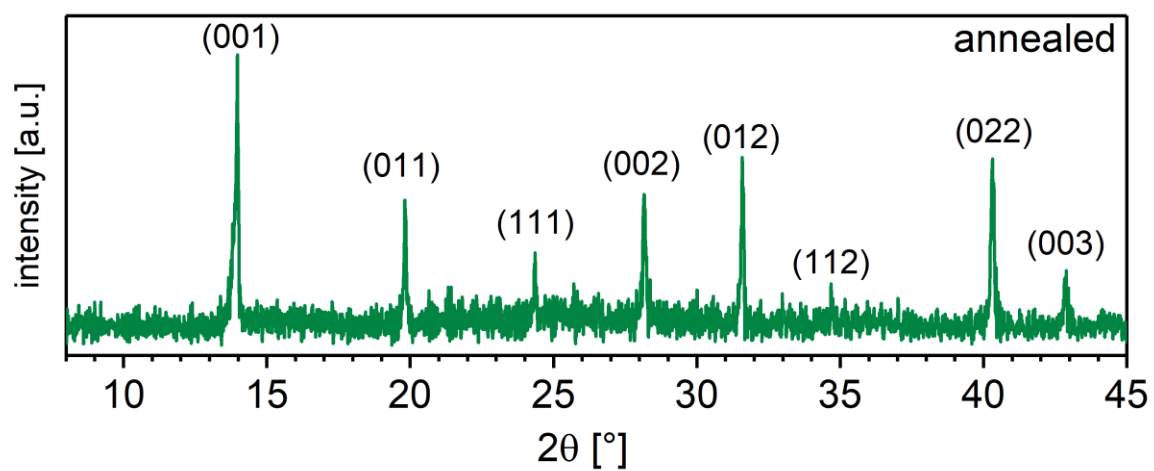

**Figure S1:** X-ray diffraction pattern of an annealed solution-processed  $\text{Cs}_{0.1}\text{FA}_{0.9}\text{PbI}_{2.9}\text{Br}_{0.1}$  perovskite film.
